# Supplementary material for: Balance, gait, and navigation performance are related to physical exercise in blind and visually impaired children and adolescents
Source: PubMed Central journal article supplement (PMC8068618; doi:10.1007/s00221-021-06038-3), 2021-02-07
Supplement: 221_2021_6038_MOESM1_ESM.pdf [file 221_2021_6038_MOESM1_ESM.pdf]

## Supplementary material to:

Balance, gait, and navigation performance are related to physical exercise in blind and visually impaired children and adolescents. *Experimental Brain Research*.

Rogge, A.-K., Hamacher, D., Cappagli, G., Kuhne, L., Hötting, K., Zech, A., Gori, M., & Röder, B.

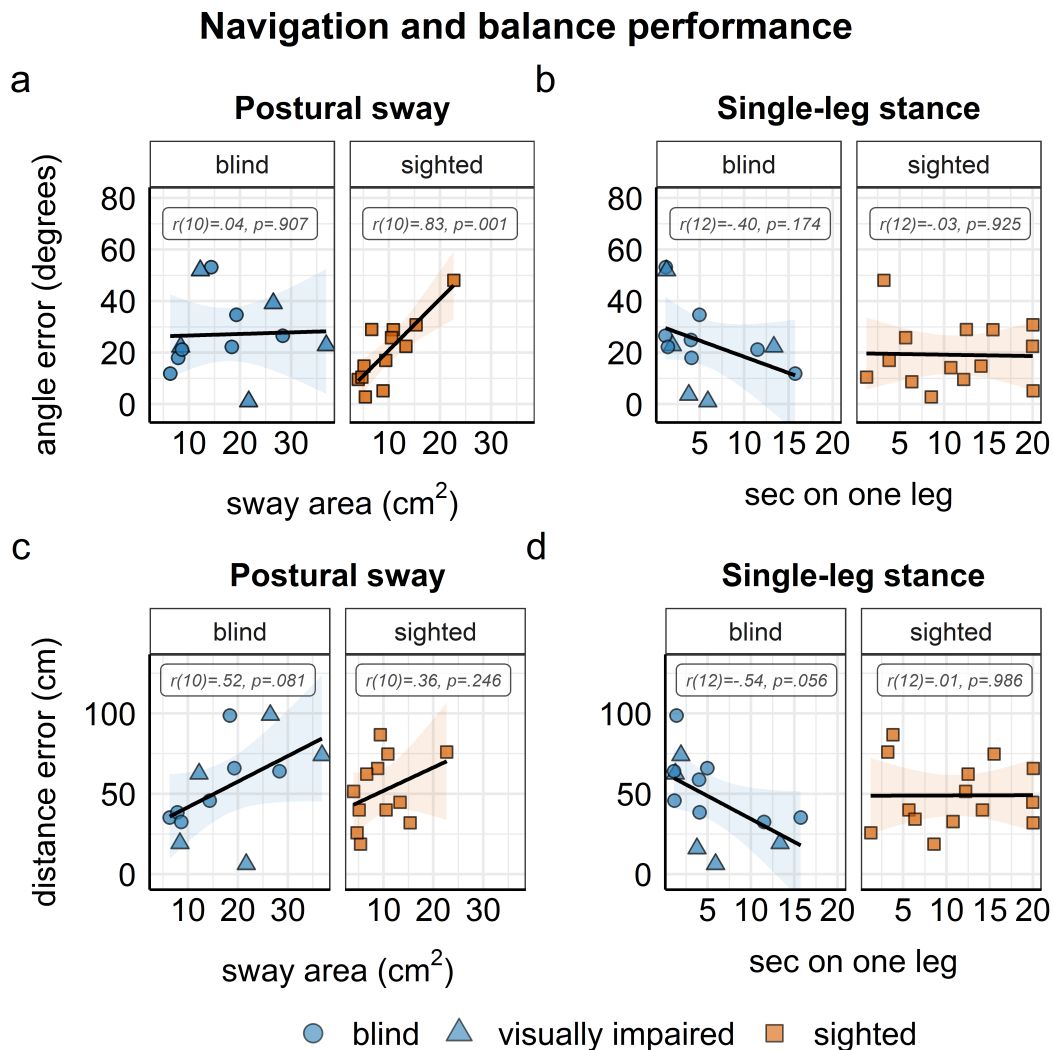

**Figure S1** Correlations between navigation performance and balance performance within the blind (blue circles) and visually impaired (blue triangles) group and the sighted (orange rectangles) group, separately for angle errors (panel a and b) and for distance errors (panel c and d) assessed with the triangle completion task. Error bands depict 95% CI, dots represent single-subject data

## Navigation performance and gait

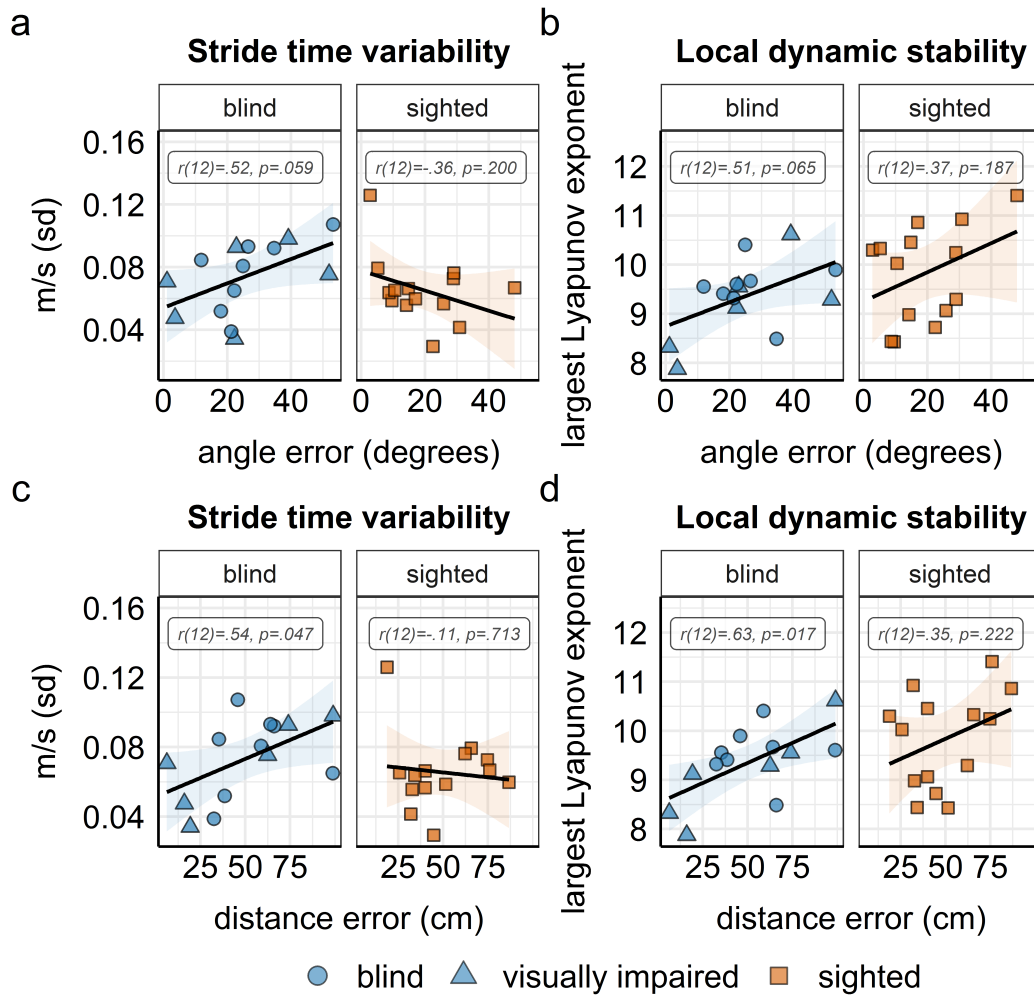

**Figure S2** Correlations between navigation performance and gait parameters within the blind (blue circles) and visually impaired (blue triangles) and the sighted (orange rectangles) group, separately for angle error (panel a and b) and for distance errors (panel c and d). Error bands depict 95% CI, dots represent single-subject data.

## Basic activities and postural stability

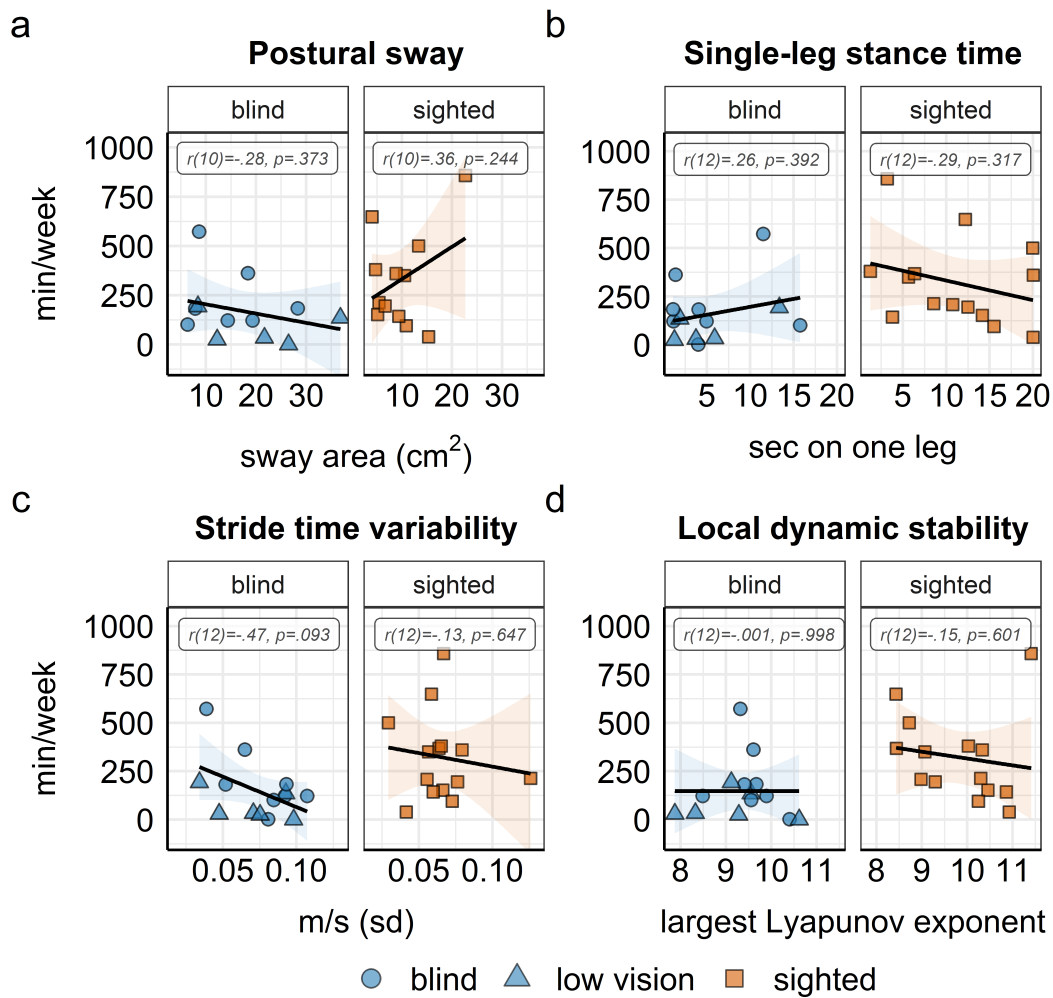

**Figure S3** Correlations of everyday basic physical activities with balance performance (panel a and b) and gait parameters (panel c and d) within the blind (blue circles) and visually impaired (blue triangles) and the sighted (orange rectangles) group. Error bands depict 95% CI, dots represent single-subject data.
